# Supplementary material for: Self-organized pattern formation of cracks perpendicular to the drying direction of a colloidal suspension
Source: Royal Society of Chemistry journal article supplement (doi:10.1039/c2sm07186j), 2012-01-01
Supplement: c2sm07186j.pdf [file c2sm07186j.pdf]

(Electronic Supplementary Information)

## **Self-organized pattern formation of cracks perpendicular to the drying direction of a colloidal suspension**

By Susumu Inasawa\* and Yukio Yamaguchi

*Department of Chemical System Engineering, Graduate School of Engineering,*

*The University of Tokyo, Hongo 7-3-1, Bunkyo-ku, Tokyo 113-8656, Japan.*

*Fax: +81-3-5841-7309; Tel: +81-3-5841-7309;*

*E-mail: inasawa@chemsys.t.u-tokyo.ac.jp*

### Captions for Electronic Supplementary Information

Movie S1 Movie file of the formation of the silica colloidal film in Fig. 2. One second in the movie corresponds to 300 s in observation time.

Movie S2 Movie file of “mirror image” observation shown in Fig. 7. One second in the movie corresponds to 100 s in observation time.

Movie S3 Movie file of observation of standing capillaries from transverse direction shown in Fig. 9. One second in the movie corresponds to 150 s in observation time.

Movie S4 Movie file of the formation of the sample in Fig. 8a. One second in the movie corresponds to 300 s in observation time.

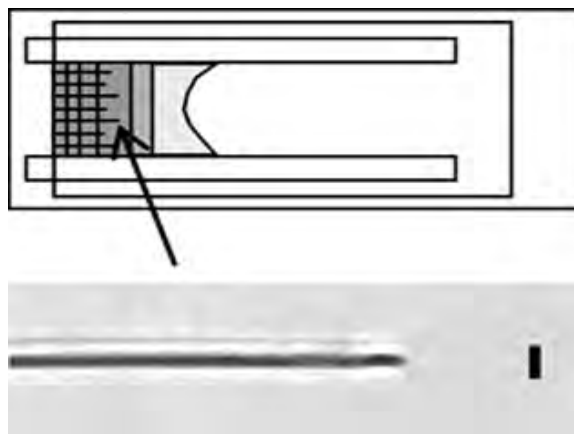

Fig. S1 Schematic illustration of the cracks in glass cell (top) and transmission microscope image of a crack tip, which is parallel to the drying direction (bottom). The vertical scale bar in the bottom image is 10  $\mu\text{m}$ . The arrow indicates the crack position we observed. We used a confocal microscope (TCS-SP2, Leica) with  $\text{Ar}^+$  laser (488 nm) as a light source.

Keywords for all files to tag

Silica colloids, perpendicular crack formation, directional drying, deformation of glass cell, self-organized pattern formation, generation of negative pressure,
